# Supplementary material for: An Integrated Approach to Assess Smart Passive Bioventing as a Sustainable Strategy for the Remediation of a Polluted Site by Persistent Organic Pollutants
Source: MDPI journal article supplement (doi:10.3390/su15043764), 2023-02-18
Supplement: s1 [file s1]

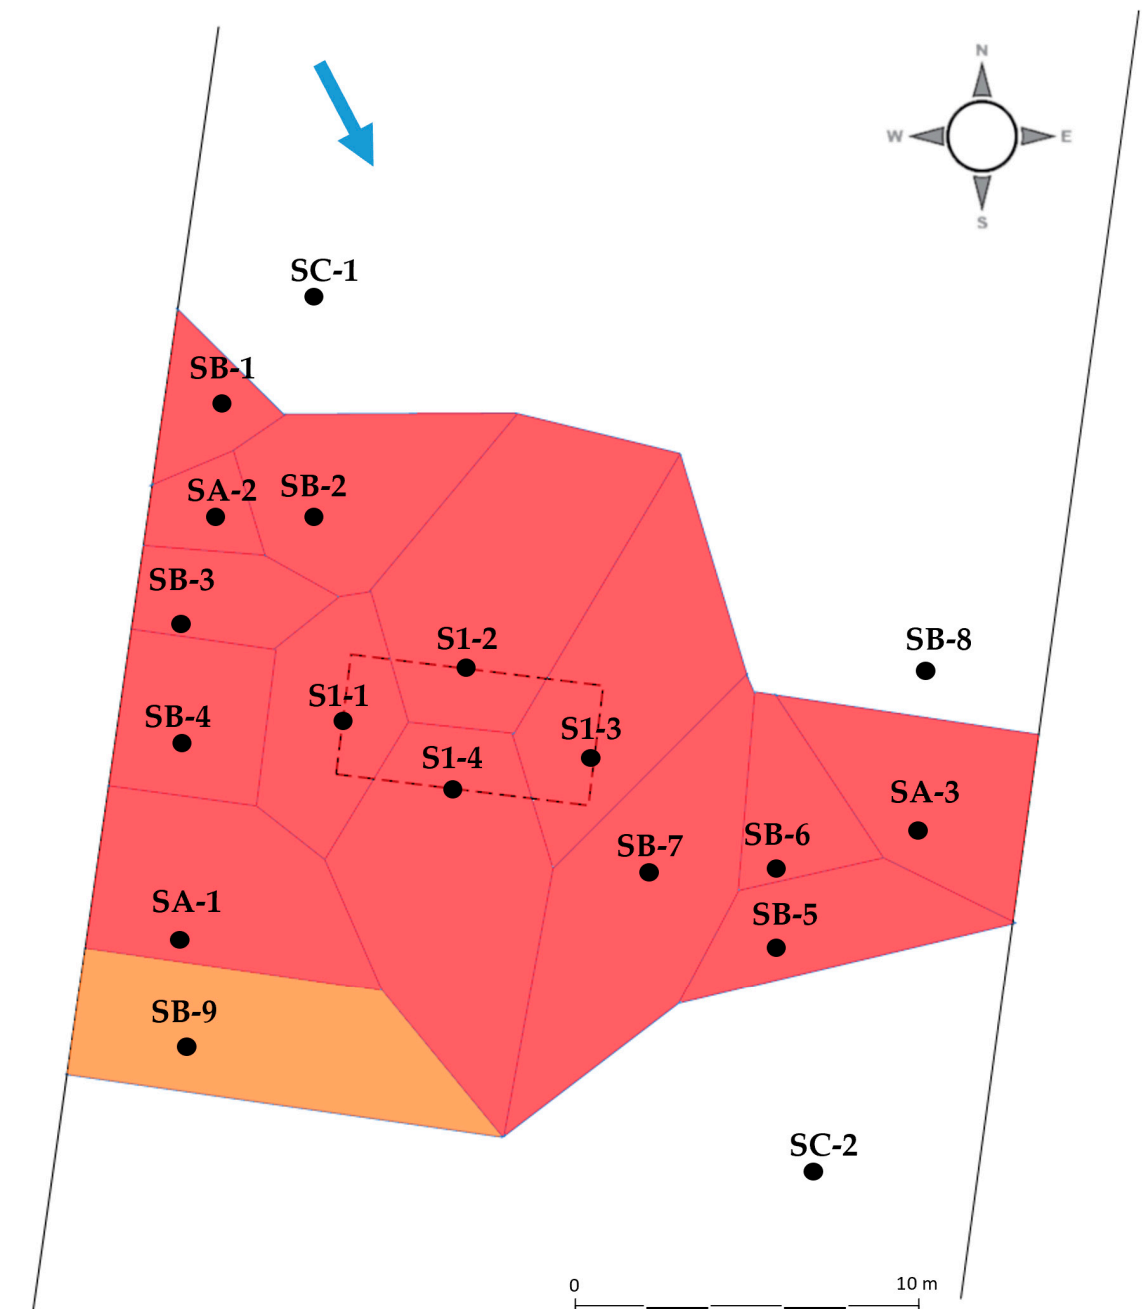

**Figure S1.** Scheme of survey points and secondary sources of contamination (in red the Thiessen polygons of the source of contamination, in orange source of hypothetical contamination). The blue arrow shows the direction of groundwater flow.

**Table S1.** Analyte concentration values in soil samples taken from excavation walls S1-1, S1-2, S1-3, S1-4 (August 2010).

| Samples<br>in m (depth) | S1-1<br>(2.5) | S1-2<br>(2.5) | S1-3<br>(2.5) | S1-4<br>(2.5) | Limits<br>(mg/kg) |
|-------------------------|---------------|---------------|---------------|---------------|-------------------|
| Ethylbenzene            | 71            | 65            | 33            | 74            | 50                |
| Styrene                 | 65            | 62            | 64            | 41            | 50                |
| Toluene                 | 91            | 85            | 94            | 92            | 50                |
| BTEX summation          | 227           | 212           | 191           | 207           | 100               |
| PCB                     | 2.9           | 3.9           | 0.001         | 6.1           | 5                 |
| Hydrocarbons C ≤ 12     | 341           | 351           | 383           | 302           | 250               |
| Hydrocarbons C > 12     | 872           | 610           | 501           | 642           | 750               |

**Table S2.** Concentration values in soil samples taken from SA-1, SA-2, SA-3 (August 2010).

| Samples<br>in m (depth) | SA1-1<br>(2.2) | SA1-2<br>(4.4) | SA1-3<br>(3.1) | SA2-1<br>(0.6) | SA2-2<br>(2.3) | SA2-3<br>(3.6) | SA3-1<br>(2.5) | SA3-2<br>(3.5) | Limits<br>(mg/kg) |
|-------------------------|----------------|----------------|----------------|----------------|----------------|----------------|----------------|----------------|-------------------|
| Ethylbenzene            | 36             | 75             | 39             | 78             | 64             | 58             | 86             | 65             | 50                |
| Styrene                 | 41             | 63             | 61             | 54             | 85             | 61             | 38             | 41             | 50                |
| Toluene                 | 95             | 97             | 88             | 89             | <LOQ           | 97             | 93             | 97             | 50                |
| BTEX summation          | 172            | 235            | 188            | 221            | 149            | 216            | 217            | 203            | 100               |
| PCB                     | 5.9            | 4.2            | 2.2            | <0.001         | 0.38           | 1.1            | 0.15           | 5.1            | 5                 |
| Hydrocarbons C ≤ 12     | 328            | 322            | 371            | 341            | 981            | 334            | 298            | 350            | 250               |
| Hydrocarbons C > 12     | 697            | 627            | 690            | 918            | <LOQ           | 985            | 554            | 490            | 750               |

**Table S3.** Concentration values in soil samples taken from SB-1, SB-2, SB-3 (February 2012).

[illegible]

|                     |      |      |      |      |      |            |      |      |      |     |
|---------------------|------|------|------|------|------|------------|------|------|------|-----|
| BTEX summation      | <LOQ | <LOQ | <LOQ | <LOQ | <LOQ | <LOQ       | <LOQ | <LOQ | <LOQ | 100 |
| PCB                 | <LOQ | <LOQ | <LOQ | <LOQ | <LOQ | <LOQ       | <LOQ | <LOQ | <LOQ | 5   |
| Hydrocarbons C ≤ 12 | <LOQ | <LOQ | <LOQ | <LOQ | <LOQ | 161        | <LOQ | <LOQ | <LOQ | 250 |
| Hydrocarbons C > 12 | <LOQ | <LOQ | 21   | <LOQ | <LOQ | <b>810</b> | <LOQ | <LOQ | <LOQ | 750 |

**Table S4.** Concentration values in soil samples taken from SB-4, SB-5 and SB-6 (February 2012).

| Samples<br>in m<br>(depth) | SB-4<br>(2.5) | SB-4<br>(3.5) | SB-4<br>(4.5) | SB-5<br>(2.5) | SB-5<br>(3.5) | SB-5<br>(4.5) | SB-6<br>(2.5) | SB-6<br>(3.5) | SB-6<br>(4.5) | Limits<br>(mg/kg) |
|----------------------------|---------------|---------------|---------------|---------------|---------------|---------------|---------------|---------------|---------------|-------------------|
| Ethylbenzene               | <LOQ          | 50                |
| Styrene                    | <LOQ          | 50                |
| Toluene                    | <LOQ          | 50                |
| BTEX summation             | <LOQ          | 100               |
| PCB                        | 0.026         | <LOQ          | <LOQ          | <LOQ          | <LOQ          | <LOQ          | 0.0008        | <LOQ          | <LOQ          | 5                 |
| Hydrocarbons C ≤ 12        | <LOQ          | <LOQ          | <LOQ          | <LOQ          | <LOQ          | <LOQ          | 41.1          | <LOQ          | <LOQ          | 250               |
| Hydrocarbons C > 12        | 567           | <LOQ          | 109           | <LOQ          | <LOQ          | <LOQ          | 418           | 15.6          | <LOQ          | 750               |

**Table S5.** Concentration values in soil samples taken from SB-7, SB-8, and SB-9 (February 2012).

| Samples<br>in m<br>(depth) | SB-7<br>(2.5) | SB-7<br>(3.5) | SB-7<br>(4.5) | SB-8<br>(2.5) | SB-8<br>(3.5) | SB-8<br>(4.5) | SB-9<br>(2.5) | SB-9<br>(3.5) | SB-9<br>(4.5) | Limits<br>(mg/kg) |
|----------------------------|---------------|---------------|---------------|---------------|---------------|---------------|---------------|---------------|---------------|-------------------|
| Ethylbenzene               | <LOQ          | 50                |
| Styrene                    | <LOQ          | 50                |
| Toluene                    | <LOQ          | 50                |
| BTEX summation             | <LOQ          | 100               |
| PCB                        | <LOQ          | 0.0011        | <LOQ          | <LOQ          | <LOQ          | <LOQ          | <LOQ          | <LOQ          | 0.0009        | 5                 |
| Hydrocarbons C ≤ 12        | <LOQ          | <b>358</b>    | 26            | <LOQ          | <LOQ          | <LOQ          | <LOQ          | 33.2          | 128           | 250               |
| Hydrocarbons C >12         | <LOQ          | <b>1852</b>   | 154           | <LOQ          | <LOQ          | <LOQ          | <LOQ          | <b>819</b>    | 688           | 750               |

**Table S6.** Concentration values in soil samples taken from SC-1 and SC-2 (February 2012).

| Samples<br>in<br>m<br>(depth) | SC-1 (2.5) | SC-1 (3.5) | SC-1 (4.5) | SC-2<br>(2.5) | SC-2 (3.5) | SC-2 (4.5) | Limits<br>(mg/kg) |
|-------------------------------|------------|------------|------------|---------------|------------|------------|-------------------|
| Ethylbenzene                  | <LOQ       | <LOQ       | <LOQ       | <LOQ          | <LOQ       | <LOQ       | 50                |
| Styrene                       | <LOQ       | <LOQ       | <LOQ       | <LOQ          | <LOQ       | <LOQ       | 50                |
| Toluene                       | <LOQ       | <LOQ       | <LOQ       | <LOQ          | <LOQ       | <LOQ       | 50                |
| BTEX summation                | <LOQ       | <LOQ       | <LOQ       | <LOQ          | <LOQ       | <LOQ       | 100               |
| PCB                           | <LOQ       | <LOQ       | <LOQ       | <LOQ          | <LOQ       | <LOQ       | 5                 |
| Hydrocarbons C ≤ 12           | <LOQ       | <LOQ       | <LOQ       | <LOQ          | <LOQ       | <LOQ       | 250               |
| Hydrocarbons C > 12           | 45         | 14.2       | 16.7       | <LOQ          | <LOQ       | <LOQ       | 750               |

The formulation of the risk analysis, scheduled by ISPRA determined the source surface in the deep ground (SP) and in the topsoil (SS) (Tables S7-S8).

**Table S7.** Contaminants Index and Maximum Values of SP Source Concentrations.

| Samples in m (depth)  |                 | SA1-1<br>(2.2)   | SA2-2<br>(2.3)   | SA3-1<br>(2.5)   | SA3-2<br>(3.5)<br>SA2-3<br>(3.6)<br>SA1-2<br>(4.4) | SB-7<br>(3.5) | Limits |
|-----------------------|-----------------|------------------|------------------|------------------|----------------------------------------------------|---------------|--------|
| Lithostratigraphy     |                 | Calcare-<br>nite | Calcare-<br>nite | Calcare-<br>nite | Clays<br>Calcare-<br>nite<br>Clays                 | Clays         | -      |
| Contaminants<br>Index | Cancer<br>Toxic | CRS<br>(mg/kg)   |                  |                  |                                                    |               |        |
| Ethylbenzene          | C               |                  |                  | 86               |                                                    |               | 50     |
| Styrene               | T               |                  | 85               |                  |                                                    |               | 50     |
| Toluene               | T               |                  |                  |                  | 97                                                 |               | 50     |
| PCB                   | C               | 5.9              |                  |                  |                                                    |               | 5      |
| Hydrocarbons C ≤ 12   | T               |                  | 981              |                  |                                                    |               | 250    |

|                     |   |  |  |  |  |      |     |
|---------------------|---|--|--|--|--|------|-----|
| Hydrocarbons C > 12 | T |  |  |  |  | 1852 | 750 |
|---------------------|---|--|--|--|--|------|-----|

**Table S8.** Contaminants Index and Values of Representative Concentrations at source SS.

|                      |               |                |         |
|----------------------|---------------|----------------|---------|
| Samples in m (depth) |               | SA2-1<br>(0.6) | Limits  |
| Lithostratigraphy    |               | backfill       | -       |
| Contaminants Index   | Cancer/Toxics | CRS<br>(mg/kg) | (mg/kg) |
| Ethylbenzene         | C             | 78             | 50      |
| Styrene              | T             | 54             | 50      |
| Toluene              | T             | 89             | 50      |
| Hydrocarbons C ≤ 12  | T             | 221            | 250     |
| Hydrocarbons C > 12  | T             | 918            | 750     |
